# Supplementary material for: Solvothermal synthesis and characterization of two 2-D layered germanium thioantimonates with transition-metal complexes
Source: Royal Society of Chemistry journal article supplement (doi:10.1039/c1dt11280e), 2011-01-01
Supplement: c1dt11280e.pdf [file c1dt11280e.pdf]

**Solvothermal synthesis and characterization of two 2-D layered germanium thioantimonates  
 with transition-metal complexes**

Jian Zhou, Litao An, Xing Liu, Xi-jiao Huang

Table S1. Selected Bond Lengths (Å) and Angles (deg) for **1** and **2**.

| <b>1</b>    |            |              |            |
|-------------|------------|--------------|------------|
| Ge1-S1      | 2.147(6)   | Sb1-S2       | 2.424(6)   |
| Ge1-S3      | 2.173(6)   | Sb1-S5       | 2.437(6)   |
| Ge1-S4      | 2.254(6)   | Sb1-S10#1    | 2.480(5)   |
| Ge1-S2      | 2.279(6)   | Sb2-S4       | 2.455(6)   |
| Sb3-S7      | 2.374(6)   | Sb2-S6       | 2.466(5)   |
| Sb3-S8      | 2.397(7)   | Sb2-S5       | 2.520(6)   |
| Sb3-S6      | 2.484(5)   | Sb4-S10      | 2.488(6)   |
| Sb4-S9#2    | 2.377(5)   | Sb4-S8       | 2.732(6)   |
| Sb4-S9      | 2.777(5)   | S2-Sb1-S5    | 100.1(2)   |
| S1-Ge1-S3   | 119.9(2)   | S2-Sb1-S10#1 | 94.9(2)    |
| S1-Ge1-S4   | 111.4(2)   | S5-Sb1-S10#1 | 89.30(19)  |
| S3-Ge1-S4   | 104.5(2)   | S4-Sb2-S6    | 92.48(18)  |
| S1-Ge1-S2   | 108.2(2)   | S4-Sb2-S5    | 98.0(2)    |
| S3-Ge1-S2   | 105.0(2)   | S6-Sb2-S5    | 89.73(18)  |
| S4-Ge1-S2   | 107.0(2)   | S7-Sb3-S8    | 102.3(2)   |
| S10-Sb4-S9  | 88.89(18)  | S7-Sb3-S6    | 96.22(19)  |
| S8-Sb4-S9   | 172.37(19) | S8-Sb3-S6    | 98.1(2)    |
| S10-Sb4-S8  | 94.58(19)  | S9#2-Sb4-S10 | 100.1(2)   |
| S9#2-Sb4-S9 | 84.01(17)  | S9#2-Sb4-S8  | 88.70(19)  |
| N9-Co2-N10  | 153.2(16)  | N3-Co1-N4    | 95.8(7)    |
| N7-Co2-N10  | 99.5(14)   | N3-Co1-N6    | 92.6(7)    |
| N9-Co2-N12  | 76.6(12)   | N4-Co1-N6    | 102.7(7)   |
| N7-Co2-N12  | 98.4(16)   | N3-Co1-N1    | 99.5(7)    |
| N10-Co2-N12 | 83.7(15)   | N4-Co1-N1    | 156.2(7)   |
| N9-Co2-N11  | 88.1(11)   | N6-Co1-N1    | 94.7(7)    |
| N7-Co2-N11  | 163.9(17)  | N3-Co1-N2    | 81.0(7)    |
| N10-Co2-N11 | 76.3(13)   | N4-Co1-N2    | 85.4(7)    |
| N12-Co2-N11 | 97(2)      | N6-Co1-N2    | 170.2(7)   |
| N9-Co2-N8   | 79.0(9)    | N1-Co1-N2    | 79.2(7)    |
| N7-Co2-N8   | 83.3(10)   | N3-Co1-N5    | 168.0(7)   |
| N10-Co2-N8  | 120.4(13)  | N4-Co1-N5    | 78.2(7)    |
| N12-Co2-N8  | 155.4(11)  | N6-Co1-N5    | 78.8(7)    |
| N11-Co2-N8  | 85.5(15)   | N1-Co1-N5    | 89.6(7)    |
| N9-Co2-N7   | 101.1(9)   | N2-Co1-N5    | 108.6(7)   |
| <b>2</b>    |            |              |            |
| Sb1-S3      | 2.4315(12) | Ge1-S6       | 2.1365(13) |
| Sb1-S4      | 2.4585(12) | Ge1-S1       | 2.2153(13) |

|             |            |           |            |
|-------------|------------|-----------|------------|
| Sb1-S5#3    | 2.4658(12) | Ge1-S5    | 2.2511(12) |
| Sb2-S2      | 2.3873(13) | Ge1-S4    | 2.2633(12) |
| Sb2-S3      | 2.4682(13) | Sb2-S1    | 2.7659(11) |
| Sb2-S2#4    | 2.6959(12) | Mn1-N4    | 2.287(4)   |
| Mn1-N5      | 2.265(4)   | Mn1-N3    | 2.292(4)   |
| Mn1-N6      | 2.277(5)   | Mn1-N1    | 2.301(4)   |
| Mn1-N2      | 2.280(5)   | S6-Ge1-S1 | 116.17(5)  |
| S3-Sb1-S4   | 100.29(5)  | S6-Ge1-S5 | 110.22(5)  |
| S3-Sb1-S5#3 | 90.04(5)   | S1-Ge1-S5 | 108.97(6)  |
| S4-Sb1-S5#3 | 91.22(5)   | S6-Ge1-S4 | 117.09(6)  |
| S2-Sb2-S3   | 102.77(5)  | S1-Ge1-S4 | 101.70(4)  |
| S2-Sb2-S2#4 | 88.23(4)   | S5-Ge1-S4 | 101.37(5)  |
| S3-Sb2-S2#4 | 85.12(4)   | N5-Mn1-N6 | 77.00(16)  |
| S2-Sb2-S1   | 83.82(4)   | N5-Mn1-N2 | 100.98(16) |
| S3-Sb2-S1   | 91.50(4)   | N6-Mn1-N2 | 101.7(2)   |
| S2#4-Sb2-S1 | 170.47(4)  | N5-Mn1-N4 | 93.57(14)  |
| N2-Mn1-N3   | 92.15(15)  | N6-Mn1-N4 | 94.33(19)  |
| N4-Mn1-N3   | 76.95(13)  | N2-Mn1-N4 | 160.38(17) |
| N5-Mn1-N1   | 97.99(16)  | N5-Mn1-N3 | 161.87(17) |
| N6-Mn1-N1   | 174.27(17) | N6-Mn1-N3 | 88.21(16)  |
| N2-Mn1-N1   | 76.36(17)  | N3-Mn1-N1 | 97.22(16)  |
| N4-Mn1-N1   | 88.72(17)  |           |            |

Symmetry transformations used to generate equivalent atoms: (#1)  $-x+1/2, y-1/2, z$ ; (#2)  $-x+1, -y+3, -z+1$ ; (#3)  $x-1/2, y, -z-1/2$ ; (#4)  $-x, -y-1, -z$ .

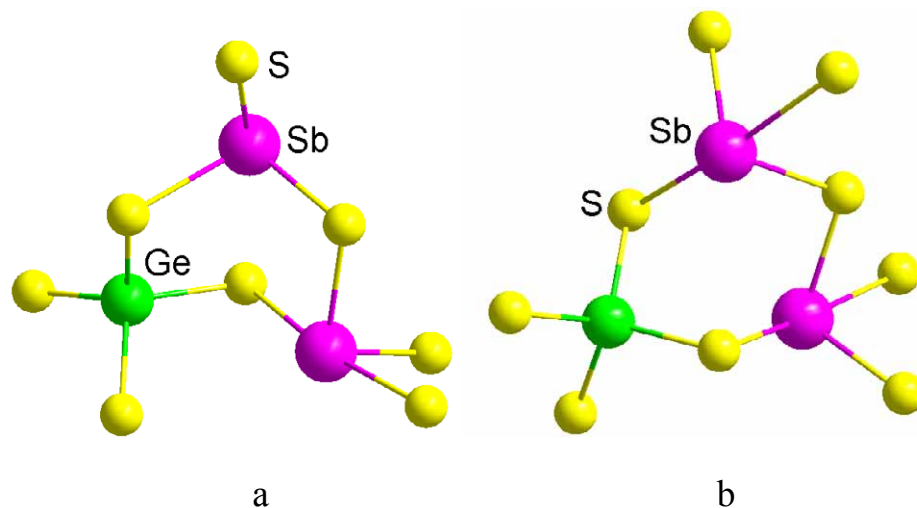

Figure S1 The structures of  $[\text{GeSb}_2\text{S}_8]$  (a) and  $[\text{GeSb}_2\text{S}_9]$  cluster (b).

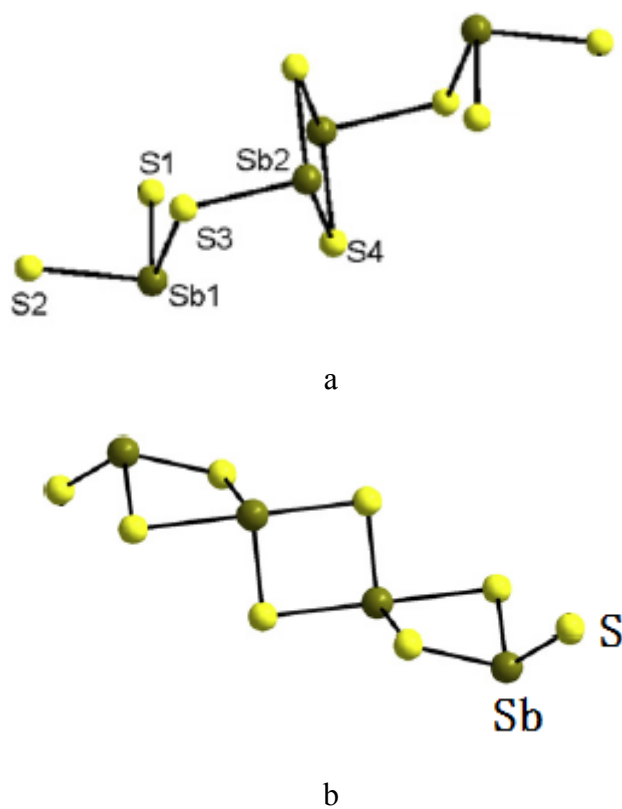

Figure S2 The structures of  $[\text{Sb}_4\text{S}_8]^{4-}$  anion (a) in  $\{\text{In}(\text{C}_6\text{H}_{14}\text{N}_2)_2\}_2\text{Sb}_4\text{S}_8\text{Cl}_2$  and  $[\text{Sb}_4\text{S}_8]^{4-}$  anion in  $[\text{M}(\text{tren})_2][\text{Sb}_4\text{S}_8]$  (M = Zn, Co) (b).

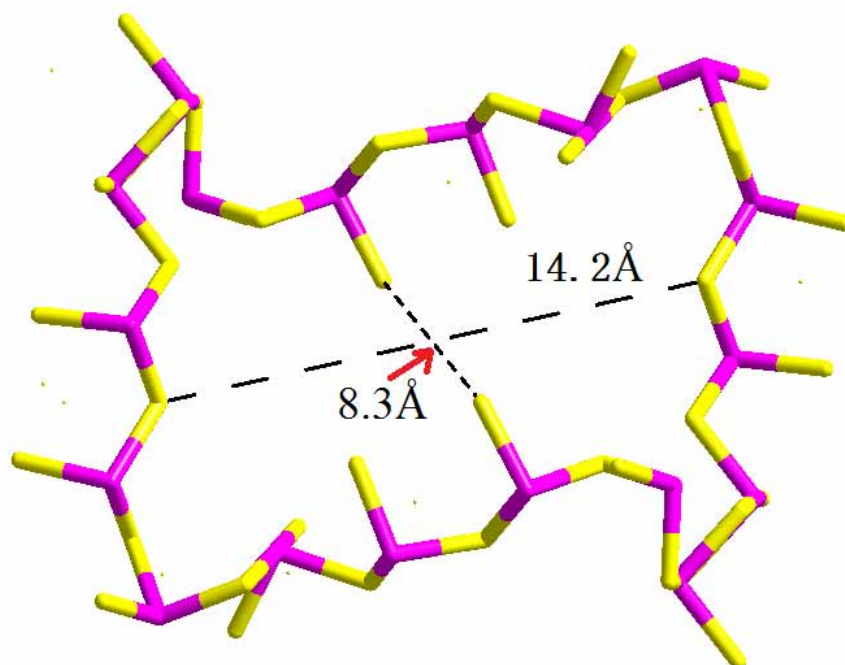

Figure S3 The rectangular 18-MR ring.

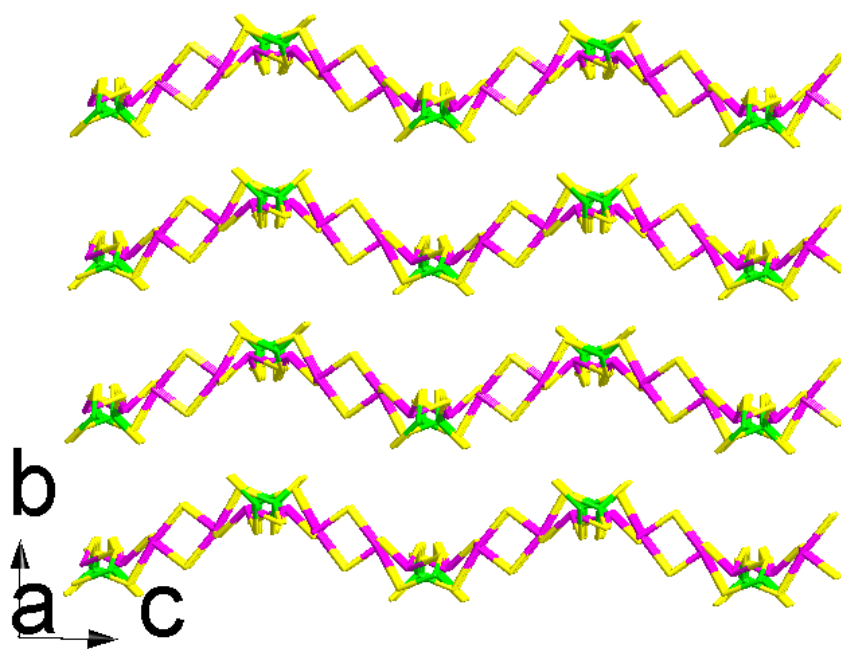

Figure S4 The adjacent layers stacked in a parallel fashion along the b-axis.

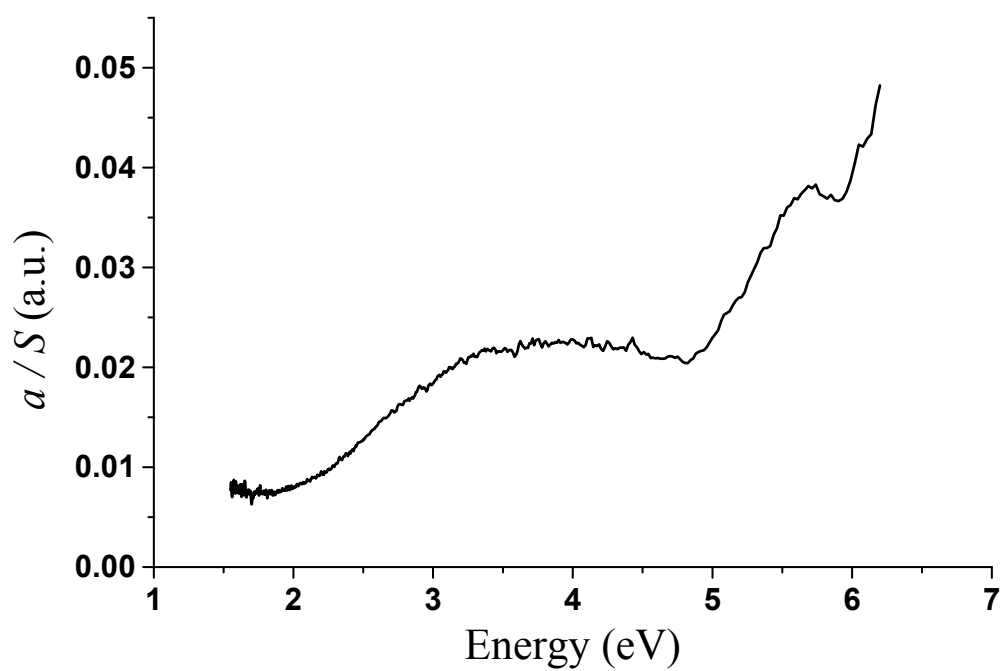

Figure S5 The diffuse reflection spectrum of 2.

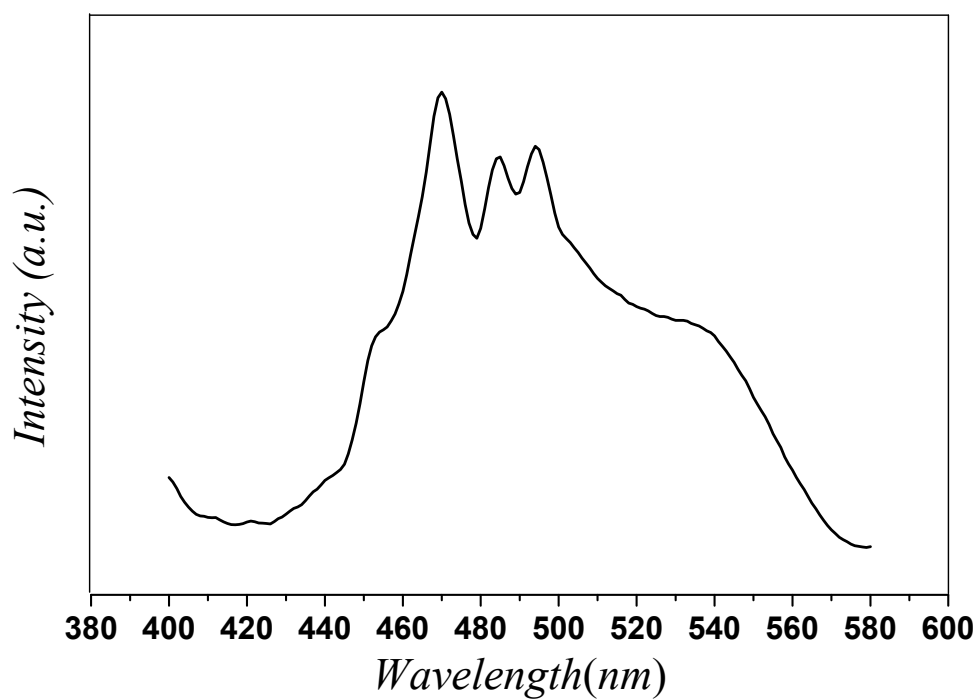

Figure S6 Solid-state photoluminescence of 2.

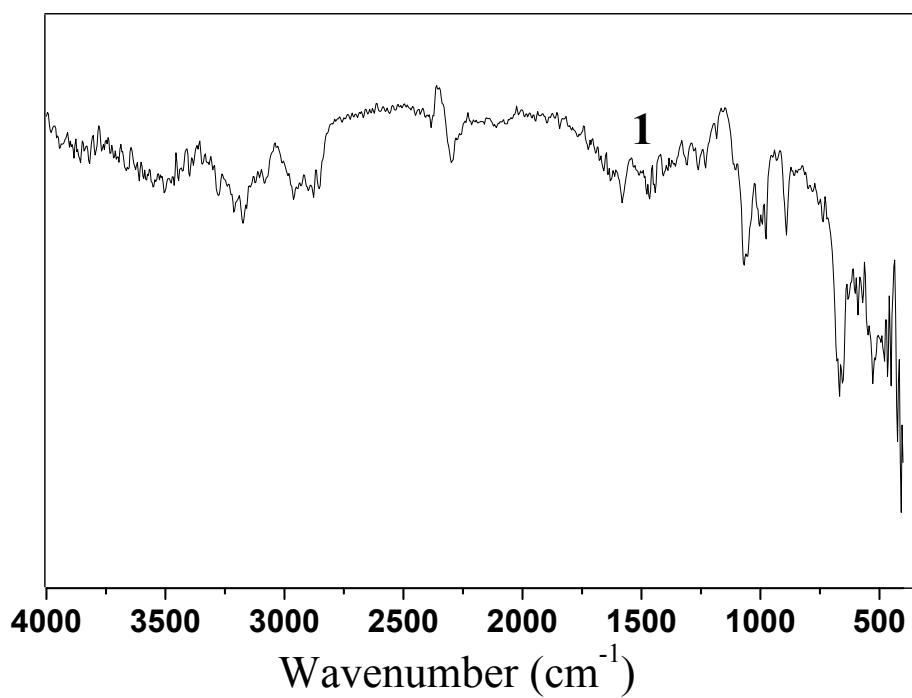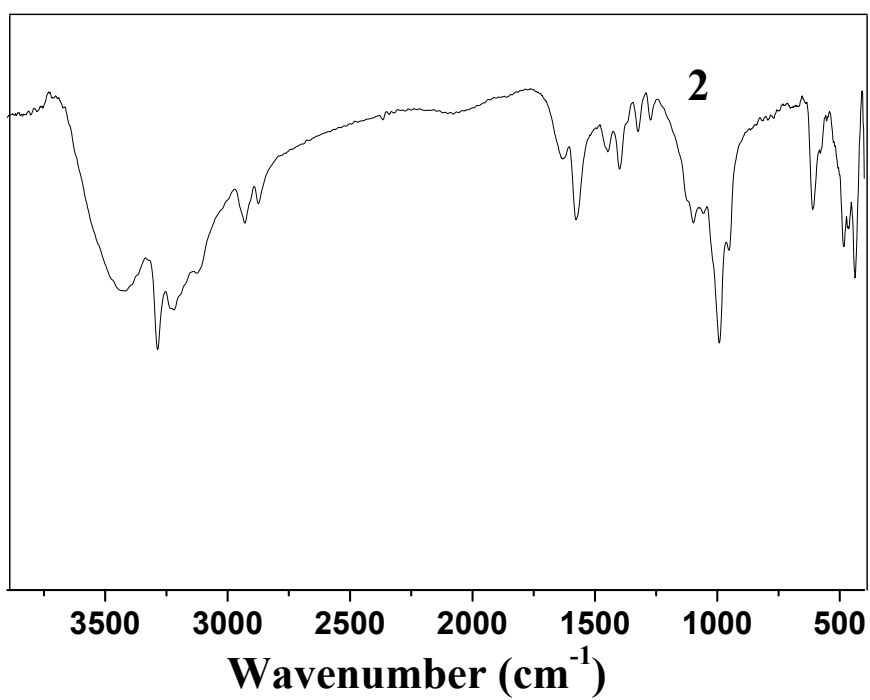

Figure S7 IR spectra of **1** and **2**.

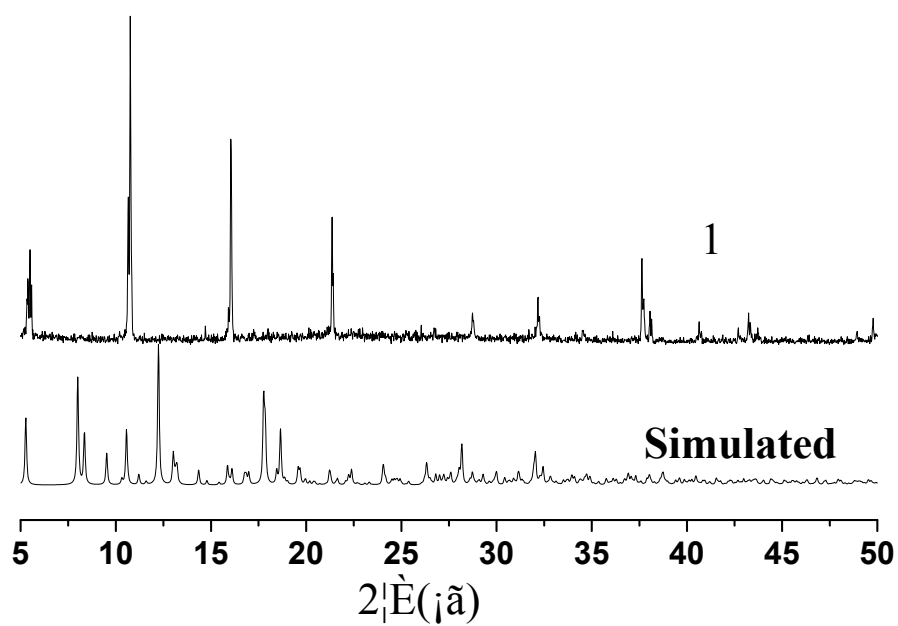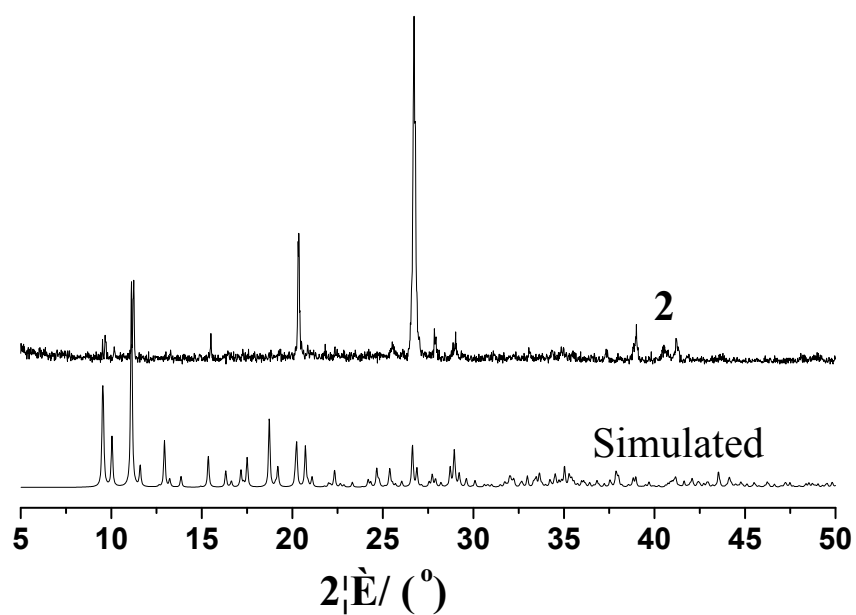

Figure S8 Experimental powder XRD pattern of **1** and **2**.

The experimental peak positions are in agreement with simulated XRD pattern, indicating the phase purity of **1** and **2**. The difference in reflection intensity between experimental and simulated XRD patterns is probably due to the preferred orientation effect of the powder sample during collection of the experimental XRD data.
